# Supplementary material for: Rescue of neonatal cardiac dysfunction in mice by administration of cardiac progenitor cells in utero
Source: PubMed Central journal article supplement (PMC4673493; doi:10.1038/ncomms9825), 2015-11-23
Supplement: ncomms9825-s1.pdf [file ncomms9825-s1.pdf]

**Supplementary Figure 1. Clone of  $\text{Speg}^{+/+}$  CPC**

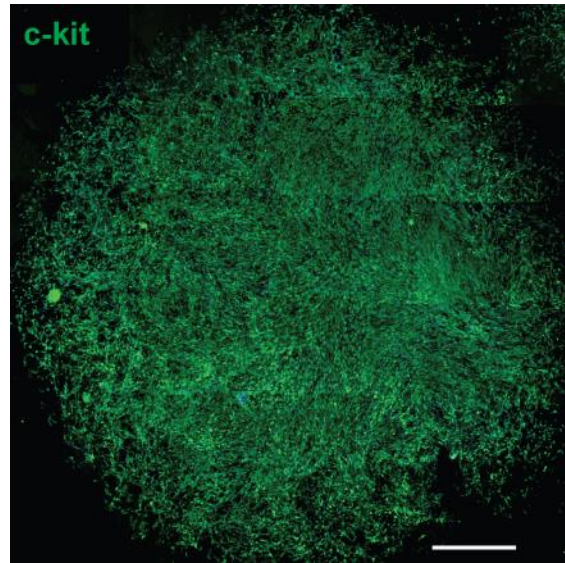

A clone originating from a putative CPC harvested from the heart of a  $\text{Speg}^{+/+}$  mouse. The clone was immunostained for c-kit (green) and DAPI (blue). The scale bar represents 1000  $\mu\text{m}$ .

## Supplementary Figure 2. Expression of *Speg* in CPCs

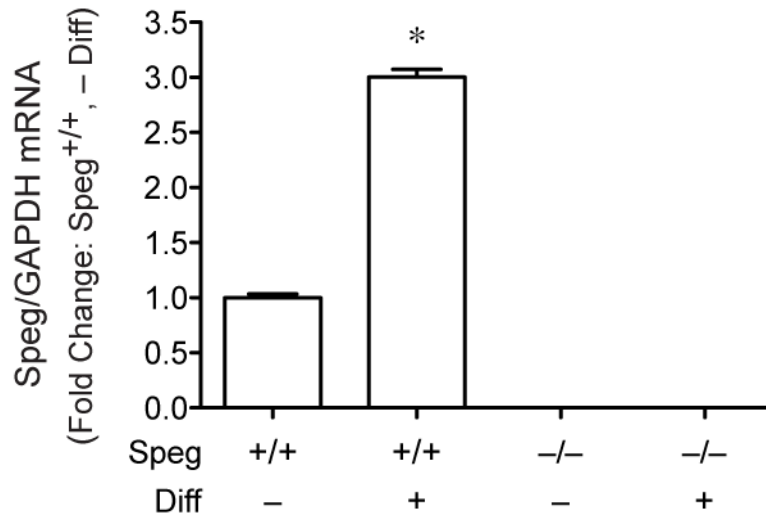

qRT-PCR was performed for *Speg* on RNA extracts from *Speg*<sup>+/+</sup> (white bars) and *Speg*<sup>-/-</sup> (black bars) CPCs after culture in medium to retain the cells in an undifferentiated state (-Diff), or in medium to promote cardiomyocyte differentiation (+Diff). Expression levels of *Speg* mRNA were divided by expression levels of the control gene GAPDH, and shown as a fold change in expression compared with *Speg*<sup>+/+</sup> -Diff. Data are presented as mean  $\pm$  SEM, n=3 independent experiments per group. \*  $P < 0.0001$  versus *Speg*<sup>+/+</sup> -Diff, *Speg*<sup>-/-</sup> -Diff, and *Speg*<sup>-/-</sup> +Diff using One-way Analysis of Variance, followed by Newman-Keuls multiple comparison test.

### Supplementary Figure 3. Characterization of CPCs

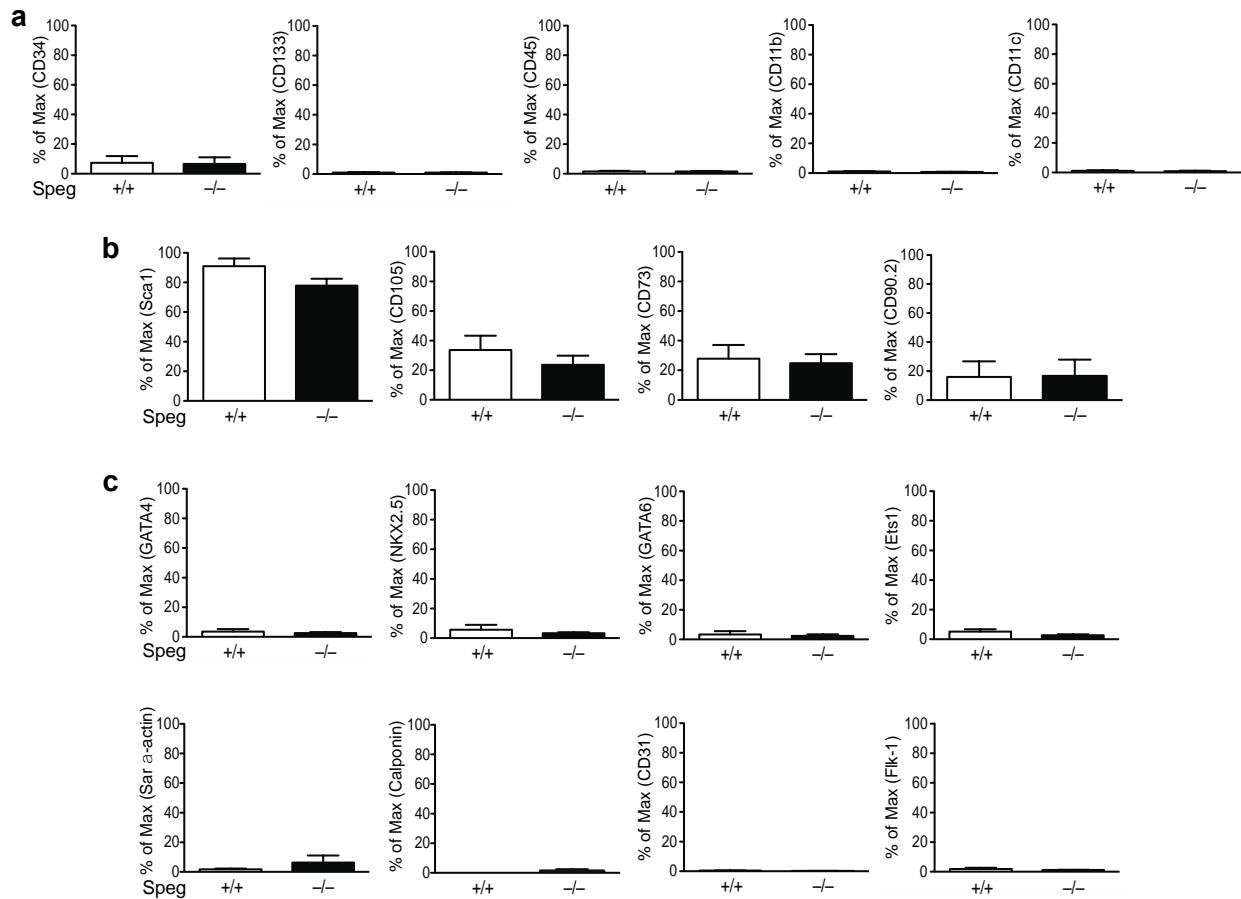

Flow cytometry characterization of Sp<sup>eg</sup><sup>+/+</sup> (white bars, cells from a minimum of 3-4 different harvests) and Sp<sup>eg</sup><sup>-/-</sup> (black bars, cells from a minimum of 2 different harvests) c-kit-positive putative CPCs. **(a)** Cells were assessed for markers of hematopoietic lineage including CD34, CD133, CD45, CD11b, and CD11c. **(b)** Cells were assessed for Sca1, and for markers of mesenchymal cells including CD105, CD73, and CD90.2. **(c)** Cells were assessed for markers of CPC commitment (GATA4), or transcription factors and cytoplasmic markers of cardiomyocyte (NKX2.5, Sar  $\alpha$ -actin), smooth muscle (GATA6, Calponin), and endothelial (Ets1, CD31, Flk-1) cell lineages.

#### Supplementary Figure 4. Putative CPCs do not differentiate into adipocytes

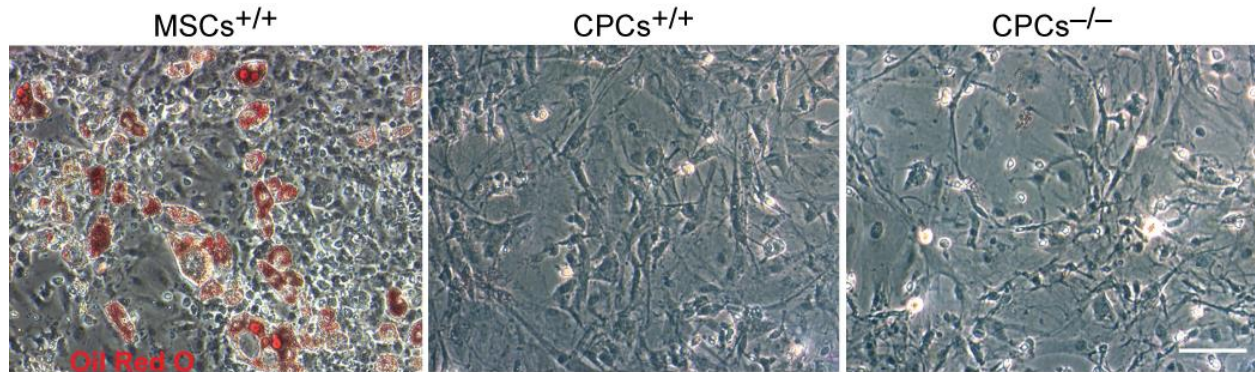

MSCs harvested from mouse adipose tissue, and CPCs harvested from hearts of *Spep*<sup>+/+</sup> and *Spep*<sup>-/-</sup> mice, were cultured in adipogenic differentiation medium for 14 days, and the cells were stained with Oil Red-O. Fat droplets stain red in cells that differentiate into adipocytes. Representative images of control MSCs (left panel), *Spep*<sup>+/+</sup> CPCs (middle panel) and *Spep*<sup>-/-</sup> CPCs (right panel). The scale bar represents 100  $\mu$ m.

**Supplementary Figure 5. Exogenous CPCs engraft and differentiate into mature cardiomyocytes in *Speg*<sup>-/-</sup> hearts**

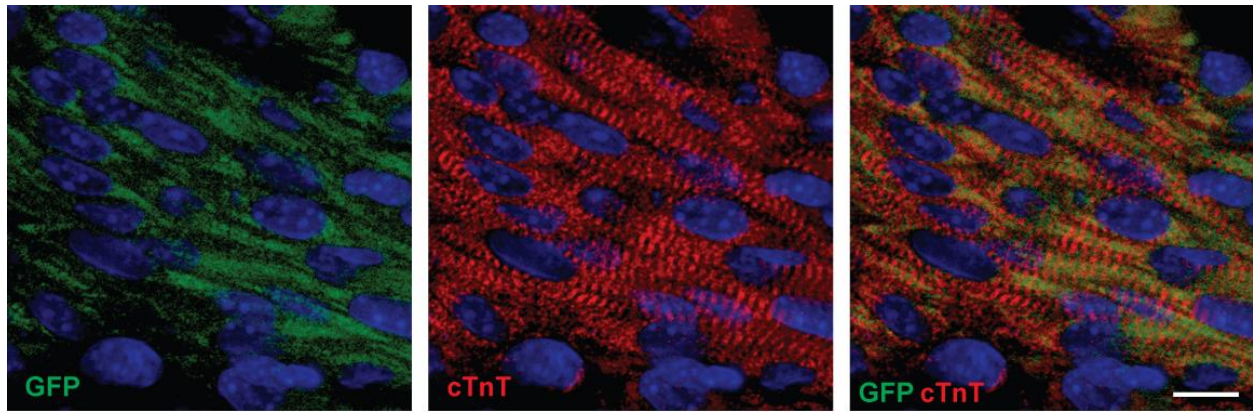

CPCs were harvested from hearts of C57BL/6-Tg(UBC-GFP)30Scha/J mice and isolated by fluorescence-activated cell sorting (FACS). CPCs were injected *in utero* at 13.5 dpc into hearts of fetuses from *Speg*<sup>+/-</sup> breeding. The hearts were harvested at day 1, and sections from a *Speg*<sup>-/-</sup> heart were immunostained for cardiac troponin T (cTnT). The confocal images show green fluorescent protein (GFP) for exogenous cells (green, left panel), the cardiomyocyte marker cTnT (red, middle panel), and merged images showing double positive cells (right panel). The scale bar represents 10  $\mu$ m.

## Supplementary Figure 6. Gating strategy for flow cytometry

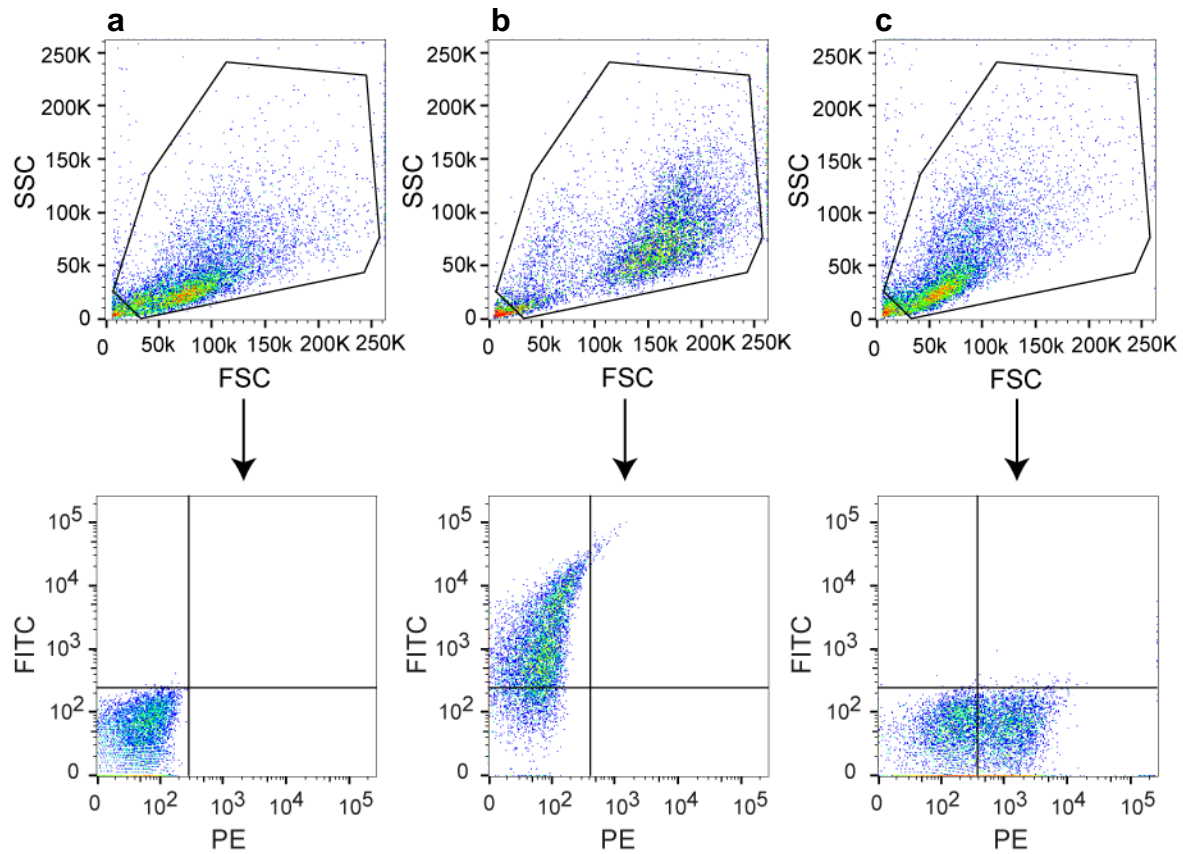

Cells were initially gated for forward and side scatter (**a-c**, upper panels). Next, unstained cells from hearts not injected with CPCs were gated as negative controls for FITC and PE (**a**, lower panel). To gate for cells positive for FITC (green fluorescence), we analyzed CPCs dyed with PKH67 (**b**, lower panel). Finally, to gate for cells positive for PE (cTnT), we analyzed cells harvested from newborn hearts not injected with CPCs and stained for cTnT (**c**, lower panel).

**Supplementary Figure 7. Percentage of total cardiac cells originating from exogenous CPCs, and percentage of total cells differentiating into cardiomyocytes**

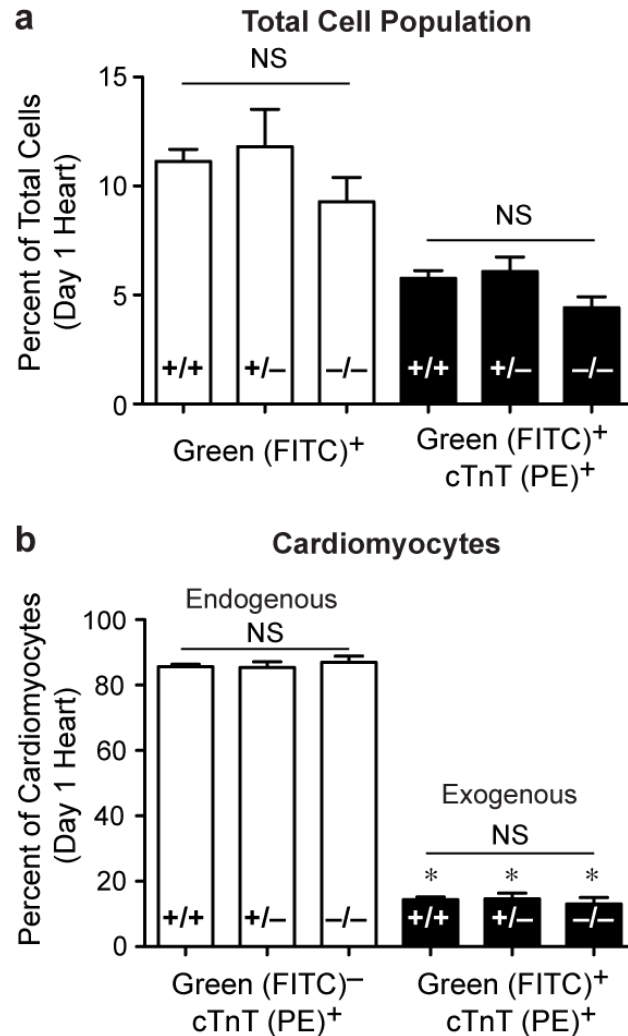

**(a)** Percentage of total cells that are green (white bars), or green cells expressing cTnT (black bars). Each group is broken down into genotypes of cells from Spg mice (wild-type, n=7, +/+; heterozygous, n=8, +/-, and homozygous mutant, n=5, -/-). **(b)** Percentage of cTnT positive cardiomyocytes that are not green (endogenous, white bar) or green (exogenous, black bar). Each groups is broken down into genotypes of cells from Spg mice (wild-type, n=7, +/+; heterozygous, n=8, +/-, and homozygous mutant, n=5, -/-).  $P < 0.0001$ ; \* versus Endogenous cardiomyocytes using One-way Analysis of Variance, followed by Newman-Keuls multiple comparison test.

## Supplementary Figure 8. Effect of CPCs on the percentage of endogenous cardiomyocytes

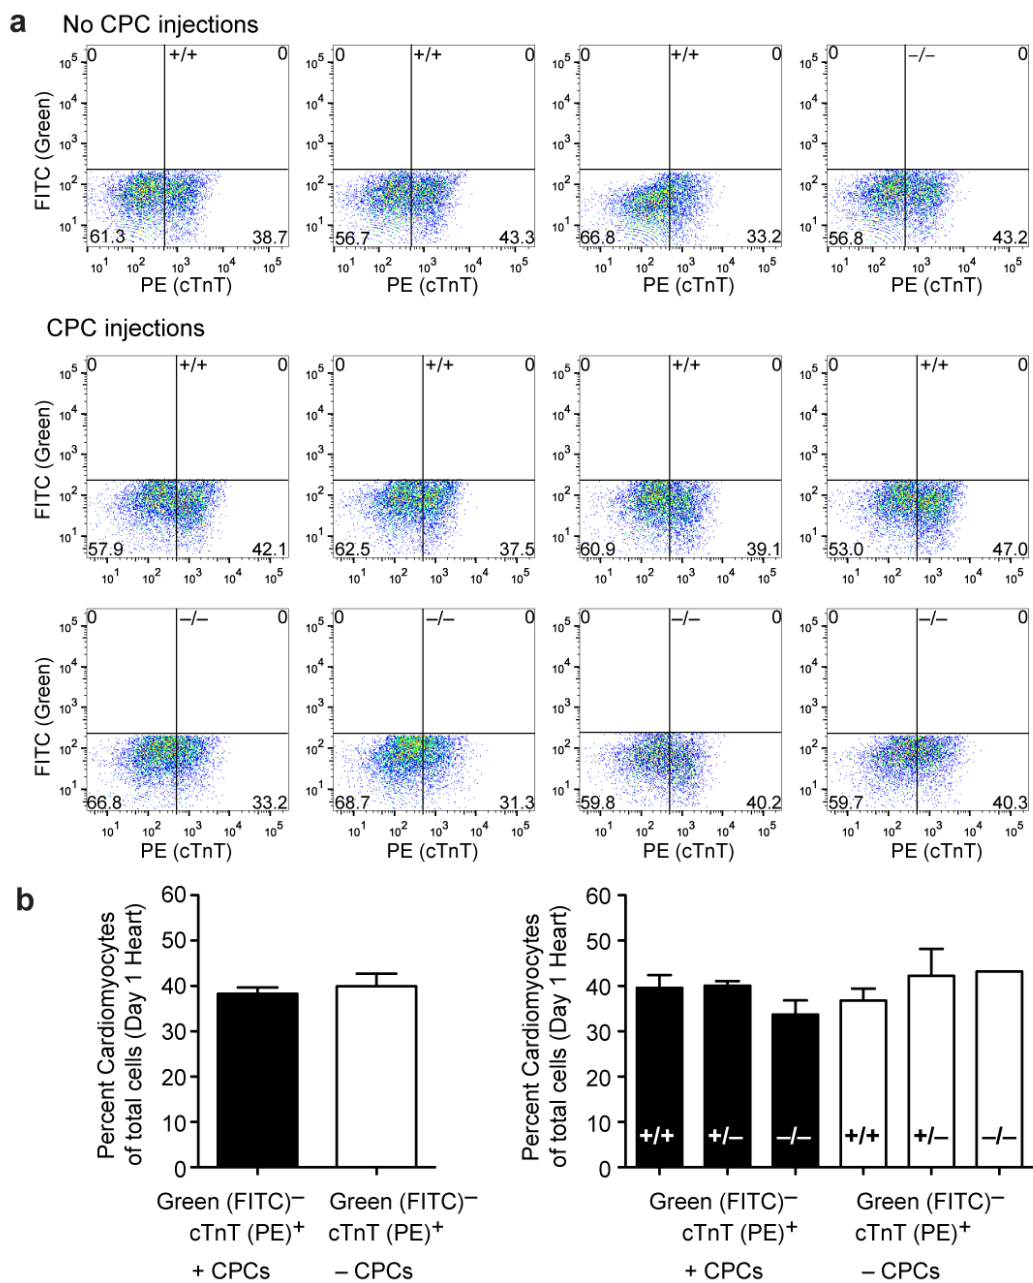

**(a)** Gating for FITC-negative cells only. Upper panels show representative flow cytometry pseudo-color density plots (4 plots from a total of 9 fetal hearts [2 pregnant dams] with no CPC injections, 8 plots from a total of 20 fetal hearts [3 pregnant dams] with CPC injections) of cells harvested from wild-type (+/+) and Spg mutant (-/-) hearts at day 1, assessing cells expressing cTnT (PE). **(b)** The left panel demonstrates the percentage of endogenous cells of hearts injected with CPCs (+) that are positive for cTnT (black bar, n=20), or endogenous cells from hearts not injected with CPCs (-) that are positive for cTnT (white bar, n=9). The right panel



separates the two groups (cTnT positive, with or without CPC injections) into genotypes (wild-type, +/+; heterozygous *Speg*, +/-; homozygous *Speg* mutant, -/-).

**Supplementary Figure 9. Diastolic assessment of *Speg*<sup>-/-</sup> and *Speg*<sup>+/+</sup> hearts after *in utero* injections of CPCs**

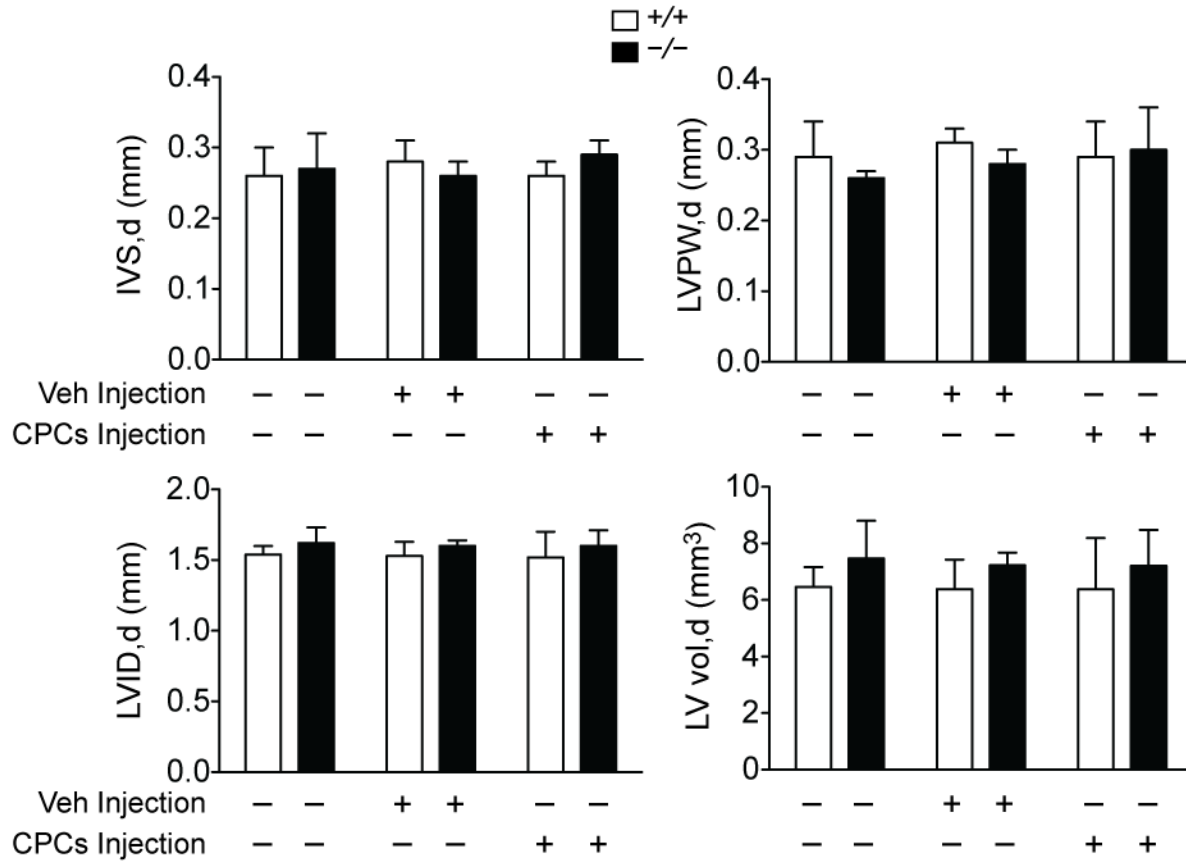

*Speg*<sup>+/+</sup> (white bars, n=6-7/group) and *Speg*<sup>-/-</sup> (black bars, n=4-5/group) mice received either no injections (-), or intra-cardiac injections (+) with vehicle (Veh) or CPCs at 13.5 dpc. On day 1 after birth (19.5 dpc), echocardiograms were performed to assess cardiac function. Measurements for thickness of the intraventricular septum (IVS) and LV posterior wall (LVPW), and dimensions of the LV internal diameter (LVID) and LV volume (LV vol) were performed during diastole (d). Data are presented as mean±SEM.

**Supplementary Figure 10. Live births of  $\text{Speg}^{-/-}$  neonates is not improved by injection of mutant CPCs**

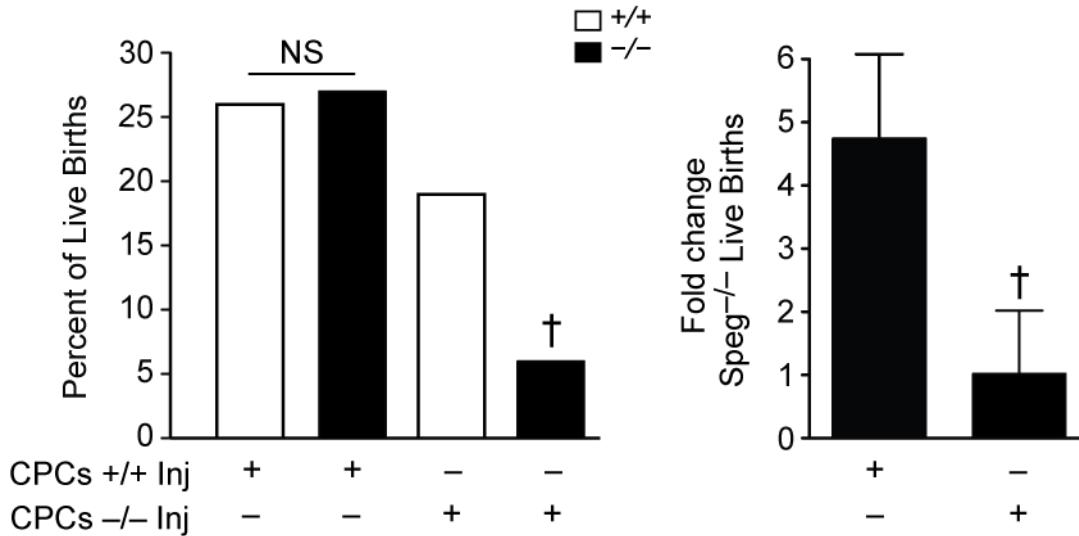

Fetuses of  $\text{Speg}^{+/-}$  pregnant dams were injected with either wild-type CPCs (+/+, n=6 litters) or mutant CPCs (-/-, n=5 litters) at 13.5 dpc. On day 1 after birth (19.5 dpc), percent of live births were assessed in  $\text{Speg}^{+/+}$  (white bars) and  $\text{Speg}^{-/-}$  (black bars) pups (left panel).  $P=0.0291$ ; † versus  $\text{Speg}^{-/-}$  pups, wild-type CPCs injection using Fisher's exact test. In the right panel, fold change (mean  $\pm$ SEM) in live births of  $\text{Speg}^{-/-}$  pups receiving either wild-type (+/+) or mutant (-/-) CPCs.  $P=0.0262$ ; † versus  $\text{Speg}^{-/-}$  pups, +/+ CPCs injection using Student's unpaired t test.

**Supplementary Table 1. Percentage of total cardiac cells originating from CPCs (FITC+, green), and percentage of total cells differentiating into cardiomyocytes (PE+, cTnT)**

|                              | % FITC+<br>PE- | % FITC+<br>PE+ | % FITC-<br>PE+ | % FITC-<br>PE- | % FITC+ cells<br>of total cells | % FITC+ PE+ cells<br>of total cells | % FITC- PE+<br>of total PE+ cells<br>(% Endogenous Myocytes) | % FITC+ PE+<br>of total PE+ cells<br>(% Exogenous Myocytes) |
|------------------------------|----------------|----------------|----------------|----------------|---------------------------------|-------------------------------------|--------------------------------------------------------------|-------------------------------------------------------------|
| <b>Dam 1, Inj CPCs (705)</b> |                |                |                |                |                                 |                                     |                                                              |                                                             |
| Pup +/+                      | 5.1            | 4.8            | 29.6           | 60.6           | 9.8                             | 4.8                                 | 86.1                                                         | 13.9                                                        |
| Pup +/+                      | 6.8            | 4.6            | 22.7           | 65.9           | 11.3                            | 4.6                                 | 83.2                                                         | 16.8                                                        |
| Pup +/-                      | 3.8            | 4.1            | 32.5           | 59.6           | 7.9                             | 4.1                                 | 88.9                                                         | 11.1                                                        |
| Pup +/-                      | 6.6            | 7.2            | 30.4           | 55.9           | 13.8                            | 7.2                                 | 80.9                                                         | 19.1                                                        |
| Pup -/-                      | 6.2            | 4.1            | 20.6           | 69.2           | 10.2                            | 4.1                                 | 83.4                                                         | 16.6                                                        |
| Pup -/-                      | 6.5            | 5.7            | 28.6           | 59.3           | 12.1                            | 5.6                                 | 83.5                                                         | 16.5                                                        |
| Pup -/-                      | 5.4            | 4.7            | 28.2           | 61.7           | 10.1                            | 4.7                                 | 85.8                                                         | 14.2                                                        |
| Pup -/-                      | 3.5            | 5.0            | 36.5           | 54.9           | 8.5                             | 5.0                                 | 88.0                                                         | 12.0                                                        |
| <b>Dam 2, inj CPCs (756)</b> |                |                |                |                |                                 |                                     |                                                              |                                                             |
| Pup +/+                      | 7.0            | 6.6            | 36.5           | 50.0           | 13.6                            | 6.6                                 | 84.8                                                         | 15.2                                                        |
| Pup +/+                      | 5.7            | 6.3            | 30.8           | 57.1           | 12.1                            | 6.3                                 | 82.9                                                         | 17.1                                                        |
| Pup +/-                      | 1.7            | 2.7            | 36.5           | 59.1           | 4.4                             | 2.7                                 | 93.0                                                         | 7.0                                                         |
| Pup +/-                      | 11.3           | 8.0            | 30.5           | 50.1           | 19.3                            | 8.0                                 | 79.2                                                         | 20.8                                                        |
| Pup +/-                      | 6.0            | 6.3            | 35.5           | 52.1           | 12.3                            | 6.3                                 | 84.9                                                         | 15.1                                                        |
| Pup +/-                      | 8.7            | 7.7            | 32.5           | 51.2           | 16.3                            | 7.7                                 | 80.9                                                         | 19.1                                                        |
| <b>Dam 3, inj CPC (784)</b>  |                |                |                |                |                                 |                                     |                                                              |                                                             |
| Pup +/+                      | 5.9            | 5.5            | 37.3           | 51.3           | 11.4                            | 5.5                                 | 87.3                                                         | 12.7                                                        |
| Pup +/+                      | 3.5            | 5.7            | 44.4           | 46.4           | 9.2                             | 5.7                                 | 88.6                                                         | 11.4                                                        |
| Pup +/+                      | 3.5            | 7.0            | 44.0           | 45.4           | 10.6                            | 7.0                                 | 86.2                                                         | 13.8                                                        |
| Pup +/-                      | 4.9            | 7.3            | 43.0           | 44.8           | 12.2                            | 7.3                                 | 85.5                                                         | 14.5                                                        |
| Pup +/-                      | 2.8            | 5.4            | 46.9           | 44.9           | 8.2                             | 5.4                                 | 89.7                                                         | 10.3                                                        |
| Pup -/-                      | 2.8            | 2.7            | 42.4           | 52.1           | 5.5                             | 2.7                                 | 94.0                                                         | 6.0                                                         |
| <b>Mean</b>                  |                |                |                |                | <b>10.9</b>                     | <b>5.6</b>                          | <b>85.8</b>                                                  | <b>14.2</b>                                                 |
| <b>SEM</b>                   |                |                |                |                | <b>0.8</b>                      | <b>0.3</b>                          | <b>0.9</b>                                                   | <b>0.9</b>                                                  |

Supplementary Table 2. Effect of CPCs on the percentage of endogenous cardiomyocytes (FITC [green]<sup>-</sup>, PE+ [cTnT])

|                             | %FITC <sup>-</sup><br>PE+ | %FITC <sup>-</sup><br>PE- | % FITC <sup>-</sup> PE+<br>of total FITC <sup>-</sup> cells<br>(% Endogenous Myocytes) |                           | %FITC <sup>-</sup><br>PE+ | %FITC <sup>-</sup><br>PE- | % FITC <sup>-</sup> PE+<br>of total FITC <sup>-</sup> cells<br>(% Endogenous Myocytes) |
|-----------------------------|---------------------------|---------------------------|----------------------------------------------------------------------------------------|---------------------------|---------------------------|---------------------------|----------------------------------------------------------------------------------------|
| <b>Dam1, inj CPCs (705)</b> |                           |                           |                                                                                        | <b>Dam1, no inj (749)</b> |                           |                           |                                                                                        |
| Pup +/+                     | 36.2                      | 63.8                      | 36.2                                                                                   | Pup 1/1 +/+               | 33.2                      | 66.8                      | 33.2                                                                                   |
| Pup +/+                     | 26.4                      | 73.6                      | 26.4                                                                                   | Pup 2/2 +/+               | 31.9                      | 68.1                      | 31.9                                                                                   |
| Pup +/-                     | 36.5                      | 63.5                      | 36.5                                                                                   | Pup 3/3 +/-               | 32.8                      | 67.2                      | 32.8                                                                                   |
| Pup +/-                     | 36.8                      | 63.2                      | 36.8                                                                                   | Pup 4/4 +/-               | 31.2                      | 68.8                      | 31.2                                                                                   |
| Pup -/-                     | 23.3                      | 76.7                      | 23.3                                                                                   |                           |                           |                           |                                                                                        |
| Pup -/-                     | 33.2                      | 66.8                      | 33.2                                                                                   | <b>Dam2, no inj (718)</b> |                           |                           |                                                                                        |
| Pup -/-                     | 31.3                      | 68.7                      | 31.3                                                                                   | Pup 5/5 +/+               | 38.7                      | 61.3                      | 38.7                                                                                   |
| Pup -/-                     | 40.3                      | 59.7                      | 40.3                                                                                   | Pup 6/6 +/+               | 43.3                      | 56.7                      | 43.3                                                                                   |
|                             |                           |                           |                                                                                        | Pup 7/7 +/-               | 54.6                      | 45.4                      | 54.6                                                                                   |
| <b>Dam2, inj CPCs (756)</b> |                           |                           |                                                                                        | Pup 8/8 +/-               | 50.2                      | 49.8                      | 50.2                                                                                   |
| Pup +/+                     | 42.1                      | 57.9                      | 42.1                                                                                   | Pup 9/9 -/-               | 43.2                      | 56.8                      | 43.2                                                                                   |
| Pup +/+                     | 37.5                      | 62.5                      | 37.5                                                                                   |                           |                           |                           |                                                                                        |
| Pup +/-                     | 39.5                      | 60.5                      | 39.5                                                                                   | <b>Mean</b>               |                           |                           | <b>39.9</b>                                                                            |
| Pup +/-                     | 39.1                      | 60.9                      | 39.1                                                                                   | <b>SEM</b>                |                           |                           | <b>2.8</b>                                                                             |
| Pup +/-                     | 40.5                      | 59.5                      | 40.5                                                                                   |                           |                           |                           |                                                                                        |
| Pup +/-                     | 40.7                      | 59.3                      | 40.7                                                                                   |                           |                           |                           |                                                                                        |
| <b>Dam3, inj CPC (784)</b>  |                           |                           |                                                                                        |                           |                           |                           |                                                                                        |
| Pup +/+                     | 39.1                      | 60.9                      | 39.1                                                                                   |                           |                           |                           |                                                                                        |
| Pup +/+                     | 47.0                      | 53.0                      | 47.0                                                                                   |                           |                           |                           |                                                                                        |
| Pup +/+                     | 48.8                      | 51.2                      | 48.8                                                                                   |                           |                           |                           |                                                                                        |
| Pup +/-                     | 45.4                      | 54.6                      | 45.4                                                                                   |                           |                           |                           |                                                                                        |
| Pup +/-                     | 42.3                      | 57.7                      | 42.3                                                                                   |                           |                           |                           |                                                                                        |
| Pup -/-                     | 40.2                      | 59.8                      | 40.2                                                                                   |                           |                           |                           |                                                                                        |
| <b>Mean</b>                 |                           |                           | <b>38.3</b>                                                                            |                           |                           |                           |                                                                                        |
| <b>SEM</b>                  |                           |                           | <b>1.4</b>                                                                             |                           |                           |                           |                                                                                        |

**Supplementary Table 3. Antibodies used for Flow Cytometry Phenotyping and Immunostaining**

| Epitope                    | Company/Cat#                       | Catalog  | Host Animal | Concentration/Dilution        | Labeling                                                              |
|----------------------------|------------------------------------|----------|-------------|-------------------------------|-----------------------------------------------------------------------|
| CD34                       | BioLegend                          | 128609   | Hamster     | 0.2 mg/ml, 1:50               | Direct PE                                                             |
| CD133                      | BioLegend                          | 141207   | Rat         | 0.2 mg/ml, 1:50               | Direct APC                                                            |
| CD45                       | BioLegend                          | 103112   | Rat         | 0.2 mg/ml, 1:50               | Direct APC                                                            |
| CD105                      | BioLegend                          | 120413   | Rat         | 0.2 mg/ml, 1:50               | Direct APC                                                            |
| Fik-1                      | BD Biosciences                     | 555308   | Rat         | 0.2 mg/ml, 1:50               | Direct PE                                                             |
| CD11c                      | BD Biosciences                     | 557401   | Hamster     | 0.2 mg/ml, 1:50               | Direct PE                                                             |
| CD11b                      | eBioscience                        | 12-0112  | Rat         | 0.2 mg/ml, 1:50               | Direct PE                                                             |
| CD31                       | eBioscience                        | 12-0311  | Rat         | 0.2 mg/ml, 1:50               | Direct PE                                                             |
| CD73                       | eBioscience                        | 12-0731  | Rat         | 0.2 mg/ml, 1:50               | Direct PE                                                             |
| Sca1                       | eBioscience                        | 17-5981  | Rat         | 0.2 mg/ml, 1:50               | Direct APC                                                            |
| CD90.2                     | eBioscience                        | 11-0903  | Rat         | 0.2 mg/ml, 1:50               | Direct FITC                                                           |
| c-kit (CD117)              | eBioscience                        | 25-1171  | Rat         | 0.2 mg/ml, 1:10               | Direct PE/Cy7                                                         |
| c-kit (CD117)              | R&D Systems                        | AF1356   | Goat        | 0.1 mg/ml, 1:10 *             | Indirect FITC (Jackson ImmunoResearch #705-096-147 1.5mg/ml, 1:100) * |
| Speg                       | Hsieh et al, J Biol Chem, (Ref #8) |          | Rabbit      | 1:50 *                        | Indirect Alexa 555 (Abcam #ab150074, 2mg/ml, 1:500) *                 |
| GATA4                      | Abcam                              | ab86371  | Mouse       | 1 mg/ml, 1:50                 | Indirect Alexa 647 (Abcam ab150107, 2mg/ml, 1:50)                     |
| GATA6                      | Abcam                              | ab22600  | Rabbit      | 1 mg/ml, 1:50                 | Indirect Alexa 647 (Abcam ab150075, 2mg/ml, 1:50)                     |
| Ets1                       | Abcam                              | ab10936  | Mouse       | Tissue culture super, 1:50    | Indirect Alexa 647 (Abcam ab150107, 2mg/ml, 1:50)                     |
| Cardiac Troponin T         | Abcam                              | ab125266 | Rabbit      | 0.5 mg/ml, 1:50               | Indirect Alexa 647 (Abcam ab150075, 2mg/ml, 1:50)                     |
|                            |                                    |          |             | 0.5 mg/ml, 1:200 *            | Indirect Alexa 555 (Abcam #ab150074, 2mg/ml, 1:500) *                 |
| Cardiac Troponin T         | Abcam                              | ab8295   | Mouse       | 2 mg/ml, 1:50                 | Indirect Alexa 647 (Abcam ab150107, 2mg/ml, 1:50)                     |
|                            |                                    |          |             | 2 mg/ml, 1:200 *              | Indirect Alex 488 (Abcam #ab150105, 2mg/ml, 1:500) *                  |
| Calponin                   | Abcam                              | ab46794  | Rabbit      | Tissue culture super, 1:100 * | Indirect Alexa 555 (Abcam #ab150074, 2mg/ml, 1:500) *                 |
| Calponin                   | Sigma-Aldrich                      | C2687    | Mouse       | 0.5-1 mg/ml, 1:50             | Indirect Alexa 647 (Abcam ab150107, 2mg/ml, 1:50)                     |
| Sarcomeric $\alpha$ -actin | Sigma-Aldrich                      | A2172    | Mouse       | 0.6-1.2 mg/ml, 1:200 *        | Indirect TRITC (Jackson #715-026-029, 1.5mg/ml, 1:200) *              |
| NKX2.5                     | Santa Cruz                         | sc-8697  | Goat        | 0.2 mg/ml; 1:50               | Indirect FITC (Invitrogen A11055, 2mg/ml, 1:50)                       |
| Wheat Germ Agglutinin      | Invitrogen                         | W11261   | N/A         | 1 mg/ml, 1:200 *              | Direct Alex 488 *                                                     |
| vWF                        | Millipore                          | AB7356   | Rabbit      | 1 mg/ml, 1:50                 | Indirect Alexa 647 (Abcam ab150075, 2mg/ml, 1:50)                     |

\* Antibodies for immunofluorescent staining

All other antibodies for flow cytometry

**Supplementary Table 4. Summary of Primers for Real-time PCR Analysis**

|            |         |                                   |
|------------|---------|-----------------------------------|
| Mus cTnT   | Forward | 5'- CCTCAAGACCTGTGTGCAGT -3'      |
|            | Reverse | 5'- CCTCTTGCTCTTCCTGTTCC -3'      |
| Mus MEF-2C | Forward | 5'- CTGTCTGGCTTCAACACTGC -3'      |
|            | Reverse | 5'- TAGTGCAAGCTCCCAACTGA -3'      |
| Mus GATA6  | Forward | 5'- AAGCGCGTGCCTTCATCAC -3'       |
|            | Reverse | 5'- GAGCCACTGCTGTTACCGGA -3'      |
| Mus VEZF1  | Forward | 5'- CCAGGGAAGCAGGTAGAGACAC -3'    |
|            | Reverse | 5'- TTTGACATAGTCCCAGACGACACAG -3' |
| Mus GAPDH  | Forward | 5'- CCTGGAGAAACCTGCCAAG -3'       |
|            | Reverse | 5'- AGGAGACAACCTGGTCCTCA -3'      |
| Mus Speg   | Probe   | TaqMan®                           |
| Mus Nkx2.5 | Probe   | TaqMan®                           |
| Mus GAPDH  | Probe   | TaqMan®                           |

**Supplementary Table 5. Summary of Cardiac Progenitor Cell Injections into Pregnant Dams (Embryonic Day 13.5)**

| <b>Spe<sup>g</sup><sup>+/-</sup> Dams</b>     | <b>Total Dams</b> | <b>Total injected fetuses (E13.5)</b> | <b>Live Births (postnatal day 1)</b> |
|-----------------------------------------------|-------------------|---------------------------------------|--------------------------------------|
| Spe <sup>g</sup> <sup>+/+</sup> CPCs injected | 9                 | 67                                    | 63                                   |
| Spe <sup>g</sup> <sup>-/-</sup> CPCs injected | 6                 | 37                                    | 30                                   |
| PBS injected                                  | 6                 | 51                                    | 45                                   |
| No injection                                  | 7                 | 0                                     | 51                                   |
| <b>Totals</b>                                 | <b>28</b>         | <b>155</b>                            | <b>189</b>                           |

### **Supplementary References**

1. Hall SR, Tsoyi K, Ith B, Padera RF, Jr., Lederer JA, Wang Z, *et al.* Mesenchymal stromal cells improve survival during sepsis in the absence of heme oxygenase-1: The importance of neutrophils. *Stem Cells* 2013, **31**(2): 397-407.
2. Zhu H, Guo ZK, Jiang XX, Li H, Wang XY, Yao HY, *et al.* A protocol for isolation and culture of mesenchymal stem cells from mouse compact bone. *Nat Protoc* 2010, **5**(3): 550-560.
